# Supplementary material for: MORC2 regulates DNA damage response through a PARP1-dependent pathway
Source: PubMed Central journal article supplement — Nucleic Acids Res. 2019 Jun 25;47(16):8502–20. doi: 10.1093/nar/gkz545 (PMC6895267; doi:10.1093/nar/gkz545), 2019-06-25
Supplement: gkz545_supplemental_file.pdf [file gkz545_supplemental_file.pdf]

## Supplementary Information

**Zhang et al.** MORC2 regulates DNA damage response through a PARP1-dependent pathway

## Supplementary Figures and Figure legends

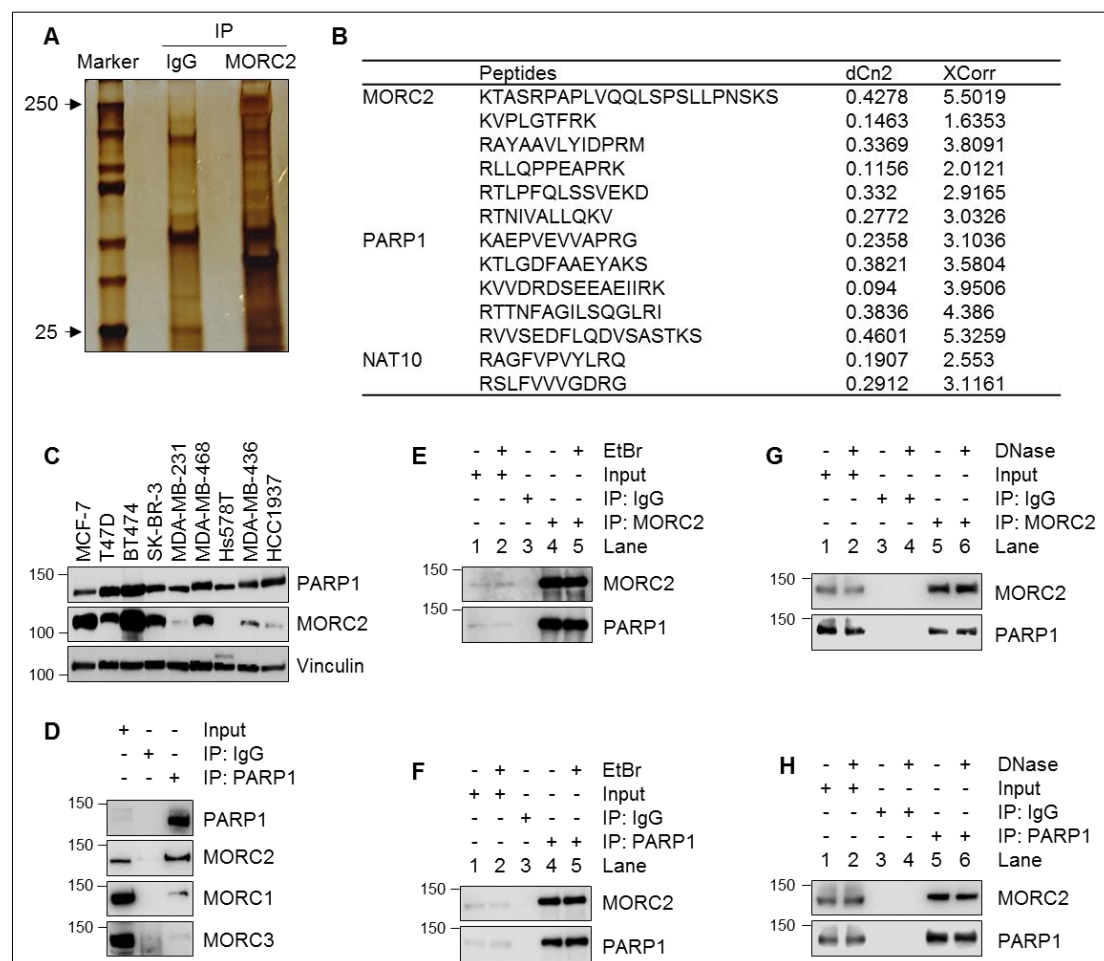

**Figure S1. MORC2 interacts with PARP1**

(A-B) Nuclear extracts of HeLa cells were immunoprecipitated with an anti-MORC2 antibody or control IgG, and the precipitated protein complexes were subjected to silver staining and liquid chromatography-tandem mass spectrometry (A). The identified peptides for MORC2, PARP1, and NAT10 are shown in B. Protein identification results were filtered with the correlation factor (Xcorr) (>1.9) and delta correlation factor (dCn) (>0.1) as a conservative criteria set developed by Yates and coworkers (1). (C) Immunoblotting analysis of the expression levels of PARP1 and MORC2 in 9 breast cancer cell lines. (D) Lysates from MCF-7 cells were subjected to IP and immunoblotting analysis with the indicated antibodies. (E-F) Lysates from MCF-7 cells were immunoprecipitated with control IgG or an anti-MORC2 (E) or an

anti-PARP1 (F) antibody in the presence or absence of 50 µg/ml ethidium bromide (EtBr), followed by immunoblotting analysis with the indicated antibodies. (G-H) Lysates from MCF-7 cells were immunoprecipitated with control IgG or an anti-MORC2 (G) or an anti-PARP1 (H) antibody in the presence or absence of 0.35 U/µl DNase, followed by immunoblotting analysis with the indicated antibodies.

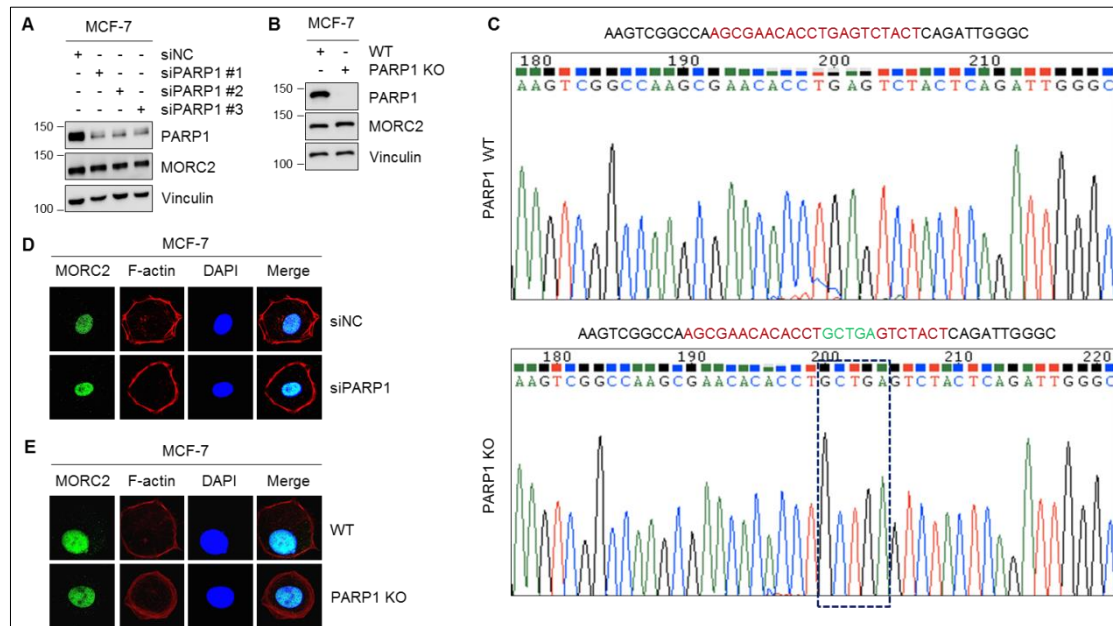

**Figure S2. Depletion of PARP1 does not affect the protein expression levels and nuclear localization of MORC2**

(A) MCF-7 cells were transfected with siNC or three siRNAs targeting PARP1. After 48 h of transfection, cells were harvested for immunoblotting analysis with the indicated antibodies. (B) Lysates from WT and PARP1 KO MCF-7 cells were subjected to immunoblotting analysis with the indicated antibodies. (C) Validation of PARP1 KO cells by PCR and sequencing across the CRISPR target sites. Sequences in red indicate CRISPR target sites, while the sequences in green represent the mutations generated. (D) MCF-7 cells were transfected with siNC or siPARP1. After 48 h of transfection, cells were immunostained with the indicated antibodies. Actin filaments (F-actin) were labeled CytoPainter Phalloidin-iFluor 680 reagent (red). Nuclei were stained with DAPI. (E) WT and PARP1 KO MCF-7 cells were immunostained with the indicated antibodies. Actin filaments (F-actin) were labeled CytoPainter Phalloidin-iFluor 680 reagent (red). Nuclei were stained with DAPI.

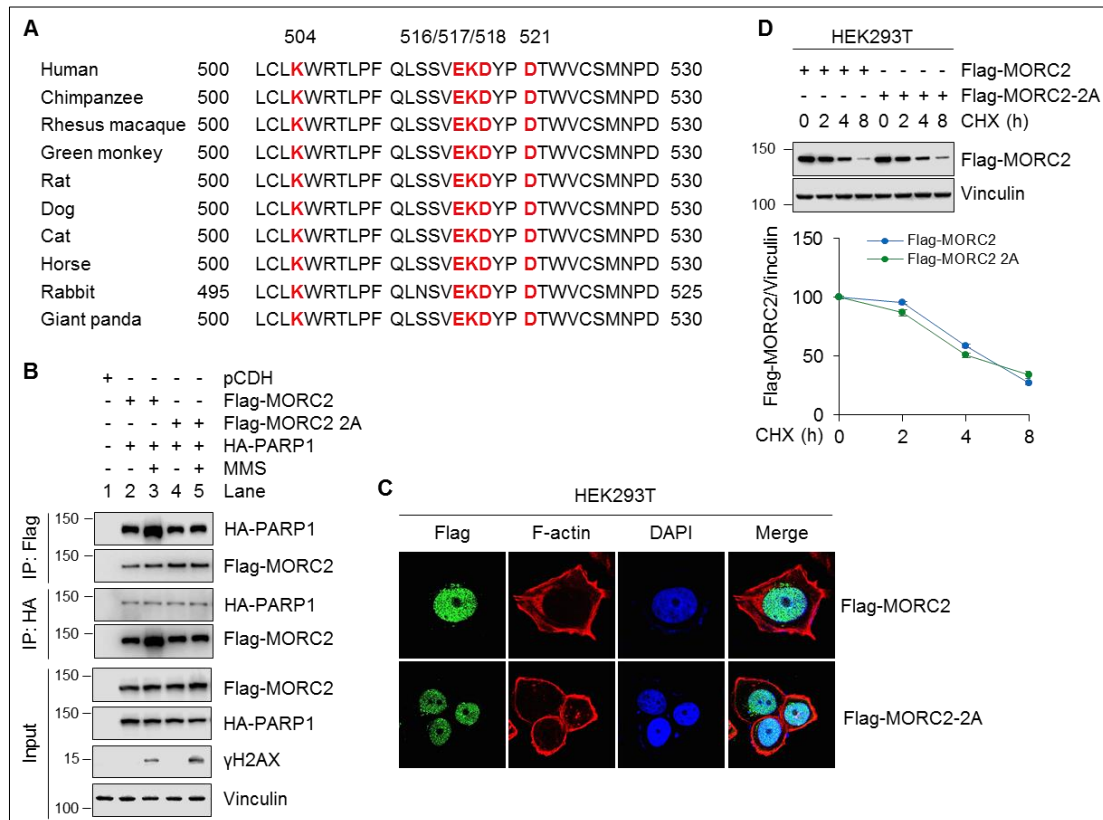

**Figure S3. The effect of PARylation on the subcellular localization and stability of MORC2**

(A) Sequence alignments of the CW-ZF domain of MORC2 from several species revealed five evolutionary conserved residues (K504, E516, K517, D518, and D521) that can potentially undergo PARylation. (B) HEK293T cells were transfected with the indicated expression vectors. After 48 h of transfection, cells were treated with or without 1 mM MMS for 30 min and lysates were subjected to IP and immunoblotting analyses with the indicated antibodies. (C) HEK293T cells were transfected with the indicated expression vectors. After 48 h of transfection, cells were immunostained with the indicated antibodies. Actin filaments (F-actin) were labeled CytoPainter Phalloidin-iFluor 680 reagent (red). Nuclei were stained with DAPI. (D) HEK293T cells were transfected with the indicated expression vectors. After 48 h of transfection, cells

were treated with 100  $\mu\text{g/ml}$  CHX for the indicated times and analyzed by immunoblotting with the indicated antibodies. Relative Flag-MORC2 expression levels (Flag-MORC2/vinculin) are shown in lower panel. The quantitative results are represented as mean  $\pm$  s.d. as indicated from three independent experiments.

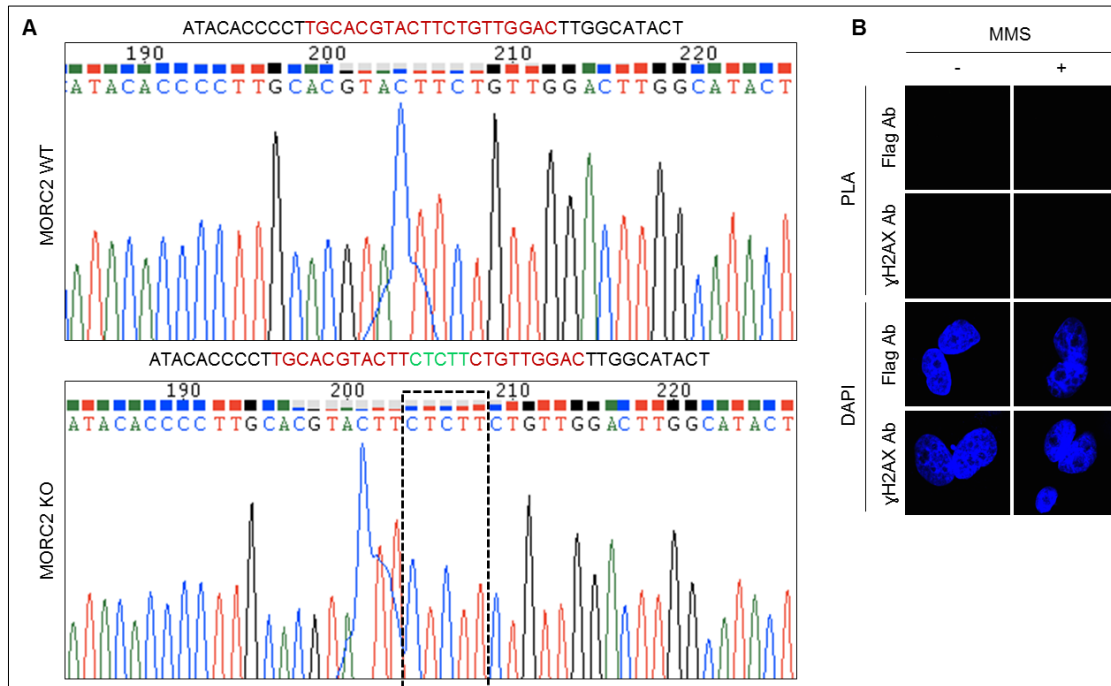

**Figure S4. Validation of MORC2 KO cells and negative controls for PLA assays**

(A) Validation of MORC2 KO cells by PCR and sequencing across the CRISPR target sites. Sequences in red indicate CRISPR target sites, while the sequences in green represent the mutations generated. (B) MORC2 KO MCF-7 cells stably expressing Flag-MORC2 and Flag-MORC2-2A were treated with or without 1 mM MMS for 30 min. Negative controls for *in situ* PLA assays were performed using a single antibody against Flag or  $\gamma$ H2AX. Nuclei were counterstained with DAPI (blue).

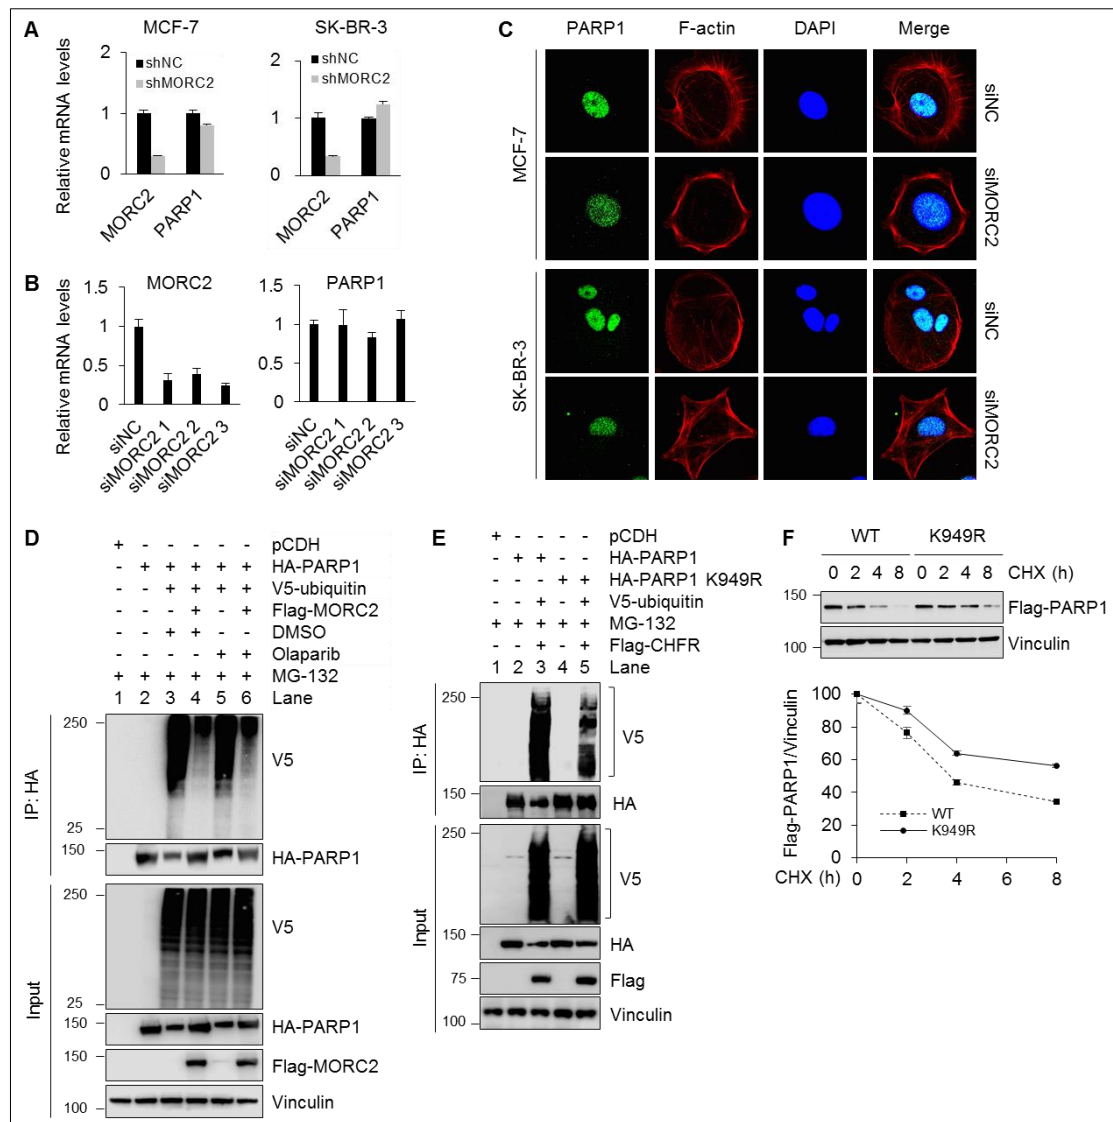

**Figure S5. MORC2 does not affect the mRNA levels and subcellular localization of PARP1**

(A) qPCR analysis of MORC2 and PARP1 mRNA levels in MCF-7 and SK-BR-3 cells stably expressing shNC and shMORC2. (B) MCF-7 and SK-BR-3 cells were transfected with siNC or three different siRNAs targeting MORC2 (siMORC2 #1-3). After 48 h of transfection, RNA was isolated and then subjected to qPCR analysis of MORC2 and PARP1 mRNA levels. (C) MCF-7 and SK-BR-3 cells were transfected with siNC or siMORC2. After 48 h of transfection, cells were immunostained with the indicated antibodies. Actin filaments (F-actin) were labeled CytoPainter



Phalloidin-iFluor 680 reagent (red). Nuclei were stained with DAPI. (D) HEK293T cells were transfected with the indicated expression vectors. After 48 h of transfection, cells were treated with 10  $\mu$ M MG-132 for 5 h and then incubated with or without 5  $\mu$ M Olaparib for another 1 h. IP and immunoblotting analyses were performed with the indicated antibodies. Lysis buffer was also supplemented with 10  $\mu$ M MG-132 in the subsequent assays. (E) HEK293T cells were transfected with the indicated plasmid DNAs. After 48 h of transfection, cells were treated with 10  $\mu$ M MG-132 for 6 h, and sequential IP and immunoblotting analyses were performed with the indicated antibodies. Lysis buffer was also supplemented with 10  $\mu$ M MG-132 in the subsequent assays. (F) HEK293T cells were transfected with HA-PARP1 or HA-PARP1 K949R. After 48 h of transfection, cells were treated with 100  $\mu$ g/ml CHX for the indicated times and analyzed by immunoblotting with the indicated antibodies. Relative HA-PARP1 expression levels (HA-PARP1/Vinculin) are shown in lower panel. The quantitative results are represented as mean  $\pm$  s.d. as indicated from three independent experiments.

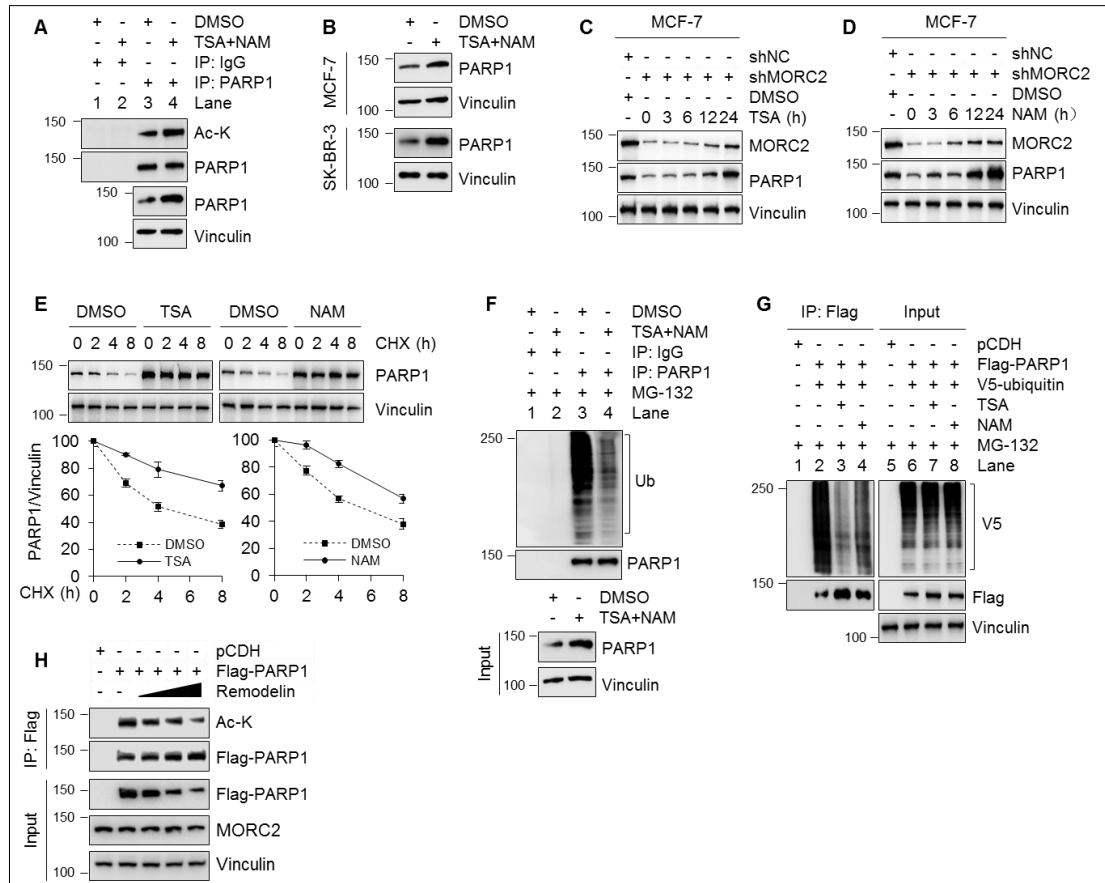

**Figure S6. MORC2 stabilizes PARP1 in an acetylation-dependent manner**

(A) MCF-7 cells were treated with DMSO or 5  $\mu$ M TSA plus 5 mM NAM for 12 h. Lysates were immunoprecipitated with control IgG or an anti-PARP1 antibody, followed by immunoblotting analysis with the indicated antibodies. (B) MCF-7 and SK-BR-3 cells were DMSO or 5  $\mu$ M TSA plus 5 mM NAM for 12 h. Lysates were analyzed by immunoblotting with the indicated antibodies. (C-D) MCF-7 cells stably expressing shNC and shMORC2 were treated with DMSO or 5  $\mu$ M TSA (C) or 5 mM NAM (D) for the indicated times. Lysates were analyzed by immunoblotting with the indicated antibodies. (E) MCF-7 cells were pretreated with DMSO and 5  $\mu$ M TSA (left) or 5 mM NAM (right) for 12 h. Then, cells were treated with 100  $\mu$ g/ml CHX for the indicated times and analyzed by immunoblotting with the indicated antibodies.

Relative PARP1 expression levels (PARP1/Vinculin) are shown in lower panels. The quantitative results are represented as mean  $\pm$  s.d. as indicated from three independent experiments. (F) MCF-7 cells were treated with DMSO or 5  $\mu$ M TSA plus 5 mM NAM for 6 h, and then incubated with 10  $\mu$ M MG-132 for another 6 h. Lysates were immunoprecipitated with control IgG or an anti-PARP1 antibody, followed by immunoblotting analysis with the indicated antibodies. Lysis buffer was also supplemented with 10  $\mu$ M MG-132 in the subsequent assays. (G) HEK293T cells were transfected with the indicated plasmid DNAs. After 48 h of transfection, MCF-7 cells were treated with DMSO or 5  $\mu$ M TSA or 5 mM NAM for 6 h, and then incubated with 10  $\mu$ M MG-132 for another 6 h. Lysates were subjected to sequential IP and immunoblotting analyses were performed with the indicated antibodies. Lysis buffer was also supplemented with 10  $\mu$ M MG-132 in the subsequent assays. (H) HEK293T cells were transfected with pCDH or Flag-PARP1. After 48 h of transfection, cells were treated with the increasing doses of NAT10 inhibitor remodelin (0, 1, 5 or 10  $\mu$ M) for 12 h and then subjected to IP and immunoblotting analyses with the indicated antibodies. The immunoprecipitated PARP1 has been adjusted to be equal to make the levels of acetylated PARP1 comparable to those of immunoprecipitated PARP1.

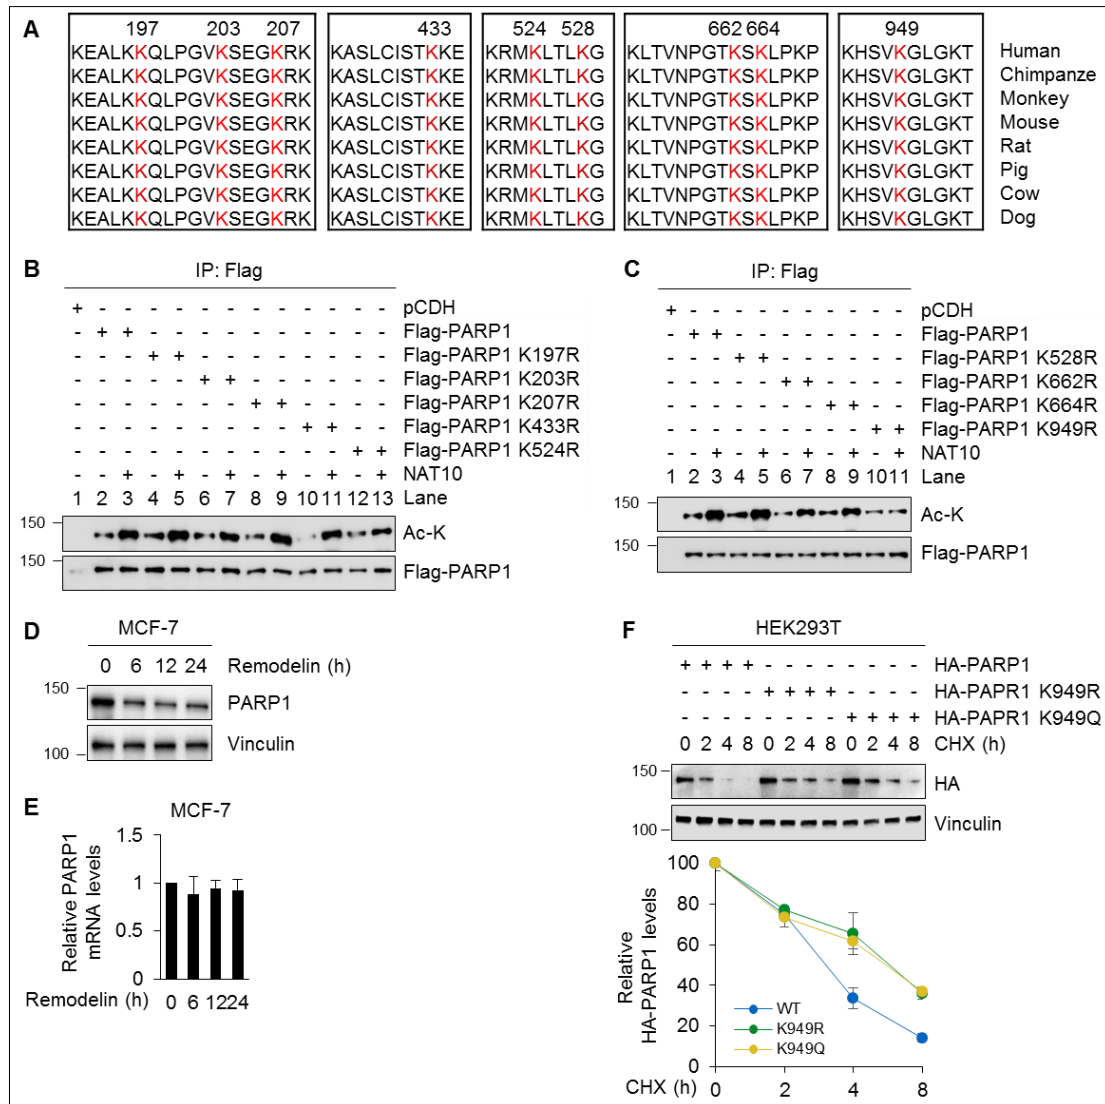

**Figure S7. NAT10 acetylates PARP1 at lysine 949**

(A) Potential acetylation sites of PARP1 identified by proteomic analyses. Sequence alignments of PARP1 from several species showed that these potential acetylation sites are evolutionary conserved. (B-C) HEK293T cells were transfected with the indicated expression vectors. After 48 h of transfection, lysates were subjected to IP and immunoblotting analyses with the indicated antibodies. (D-E) MCF-7 cells were treated with 5  $\mu$ M remodelin for the indicated times. Cells were harvested and subjected to immunoblotting (D) or qPCR (E) analysis of PARP1 protein or mRNA

levels, respectively. (F) HEK293T cells were transfected with HA-PARP1, HA-PARP1 K949R, or HA-PARP1 K949Q. After 48 h of transfection, cells were treated with 100  $\mu$ g/ml CHX for the indicated times and analyzed by immunoblotting with the indicated antibodies. Relative HA-PARP1 expression levels (HA-PARP1/Vinculin) are shown in lower panel. The quantitative results are represented as mean  $\pm$  s.d. as indicated from three independent experiments.

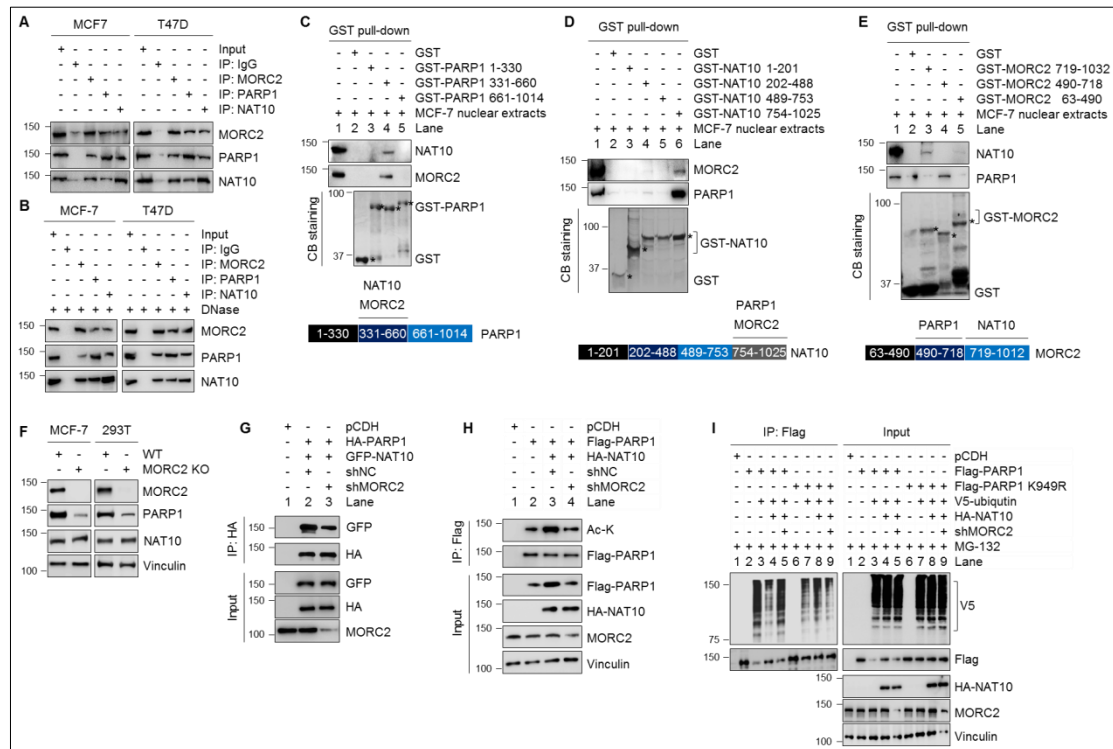

**Figure S8. MORC2, PARP1, and NAT10 form a ternary complex**

(A-B) Lysates from MCF-7 and T47D cells were immunoprecipitated with control IgG or antibodies against MORC2, PARP1, or NAT10 in the absence (A) or the presence (B) of 0.35 U/ $\mu$ l DNase, followed by immunoblotting analysis with the indicated antibodies. (C) GST or GST-PARP1 deletion fragments were incubated with MCF-7 nuclear extracts. The pull-down protein complex was subjected to immunoblotting analysis with an anti-MORC2 or anti-NAT10 antibody. GST or GST-PARP1 proteins were stained by Coomassie brilliant blue (CB) solution as loading controls. The domain of PARP1 for MORC2 and NAT10 binding is indicated in bottom panel. (D) GST or GST-NAT10 deletion fragments were incubated with MCF-7 nuclear extracts. The pull-down protein complex was subjected to immunoblotting analysis with an anti-MORC2 or anti-PARP1 antibody. GST or GST-NAT10 proteins were stained by

CB solution as loading controls. The region of NAT10 for MORC2 and PARP1 binding is shown in bottom panel. (E) GST or GST-MORC2 deletion fragments were incubated with MCF-7 nuclear extracts. The pull-down protein complex was subjected to immunoblotting analysis with an anti-NAT10 or anti-PARP1 antibody. GST or GST-MORC2 proteins were stained by CB solution as loading controls. The region of MORC2 for NAT10 and PARP1 binding is shown in bottom panel. (F) WT and MORC2 KO cells (MCF-7 and HEK293T) were harvested for immunoblotting analysis with indicated antibodies. (G-H) HEK293T cells were transfected with the indicated expression vectors. After 48 h of transfection, lysates were subjected to sequential IP and immunoblotting analysis with the indicated antibodies. (I) HEK293T cells were transfected with the indicated expression vectors. After 48 h of transfection, cells were treated with 10  $\mu$ M MG-132 for 6 h, and lysates were subjected to sequential IP and immunoblotting analysis with the indicated antibodies. Lysis buffer was also supplemented with 10  $\mu$ M MG-132 in the subsequent assays.

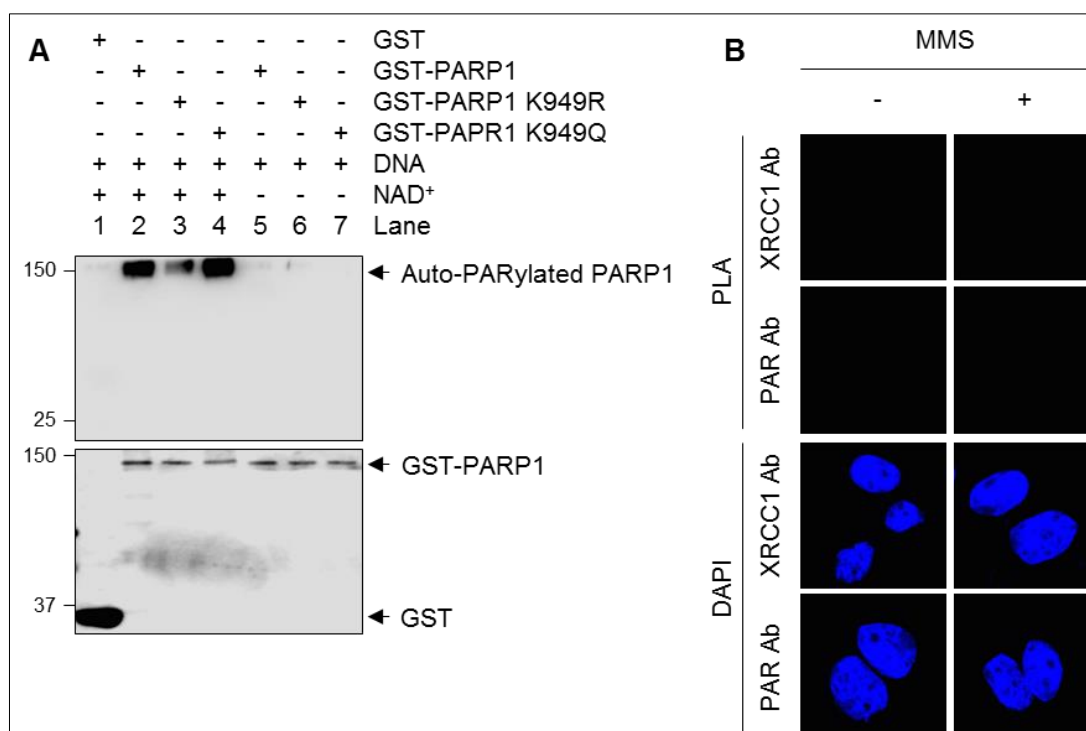

**Figure S9. Acetylation of PARP1 at K949 affects its PAR activity**

(A) *In vitro* PARylation assay was performed using purified WT, K949R, or K949Q mutant of PARP1 in the presence or absence of NAD<sup>+</sup> and sonicated salmon sperm DNA as indicated. PARylated PARP1 was detected with an anti-PAR antibody. (B) MCF-7 cells were treated with or without 1 mM MMS for 30 min. Negative controls for *in situ* PLA assays were performed using a single antibody against XRCC1 or PAR. Nuclei were counterstained with DAPI (blue).



## Supplementary Tables

**Table S1. Information for the expression vectors used in this study**

| Plasmids             | Sources   | Vectors               |
|----------------------|-----------|-----------------------|
| Myc-DDK-MORC2        | Origene   | pCMV6-Entry           |
| Flag-MORC2-WT        | Subcloned | pCDH-CMV-MCS-EF1-Puro |
| Flag-MORC2-K504A     | Subcloned | pCDH-CMV-MCS-EF1-Puro |
| Flag-MORC2-E516A     | Subcloned | pCDH-CMV-MCS-EF1-Puro |
| Flag-MORC2-K517A     | Subcloned | pCDH-CMV-MCS-EF1-Puro |
| Flag-MORC2-D518A     | Subcloned | pCDH-CMV-MCS-EF1-Puro |
| Flag-MORC2-D521A     | Subcloned | pCDH-CMV-MCS-EF1-Puro |
| Flag-MORC2-2A        | Subcloned | pCDH-CMV-MCS-EF1-Puro |
| Flag-MORC2-5A        | Subcloned | pCDH-CMV-MCS-EF1-Puro |
| GST-MORC2            | Subcloned | pGEX-6P-1             |
| GST-MORC2 63-490     | Subcloned | pGEX-6P-1             |
| GST-MORC2 491-718    | Subcloned | pGEX-6P-1             |
| GST-MORC2 491-718 5A | Subcloned | pGEX-6P-1             |
| GST-MORC2 719-1032   | Subcloned | pGEX-6P-1             |
| GST-MORC2-K504A      | Subcloned | pGEX-6P-1             |
| GST-MORC2-E516A      | Subcloned | pGEX-6P-1             |
| GST-MORC2-K517A      | Subcloned | pGEX-6P-1             |
| GST-MORC2-D518A      | Subcloned | pGEX-6P-1             |
| GST-MORC2-D521A      | Subcloned | pGEX-6P-1             |
| GST-MORC2-2A         | Subcloned | pGEX-6P-1             |
| Myc-DDK-PARP1        | Origene   | pCMV6-Entry           |
| Myc-DDK-PARP1 K197R  | Subcloned | pCMV6-Entry           |
| Myc-DDK-PARP1 K203R  | Subcloned | pCMV6-Entry           |
| Myc-DDK-PARP1 K207R  | Subcloned | pCMV6-Entry           |
| Myc-DDK-PARP1 K433R  | Subcloned | pCMV6-Entry           |
| Myc-DDK-PARP1 K524R  | Subcloned | pCMV6-Entry           |
| Myc-DDK-PARP1 K528R  | Subcloned | pCMV6-Entry           |
| Myc-DDK-PARP1 K662R  | Subcloned | pCMV6-Entry           |
| Myc-DDK-PARP1 K664R  | Subcloned | pCMV6-Entry           |
| Myc-DDK-PARP1 K949R  | Subcloned | pCMV6-Entry           |
| Myc-DDK-PARP1 E988K  | Subcloned | pCMV6-Entry           |
| HA-PARP1             | Subcloned | pCDH-CMV-MCS-EF1-Puro |
| HA-PARP1 E988K       | Subcloned | pCDH-CMV-MCS-EF1-Puro |
| HA-PARP1 E988Q       | Subclone  | pCDH-CMV-MCS-EF1-Puro |
| His-PARP1            | Subcloned | pET28a(+)             |
| GST-PARP1 1-331      | Subcloned | pGEX-6P-1             |
| GST-PARP1 332-661    | Subcloned | pGEX-6P-1             |
| GST-PAPR1 662-1014   | Subcloned | pGEX-6P-1             |
| HA-NAT10             | Subcloned | pCDH-CMV-MCS-EF1-Puro |
| HA-NAT10 G641E       | Subcloned | pCDH-CMV-MCS-EF1-Puro |
| GFP-NAT10            | Origene   | pCMV6-AC-GFP          |
| GST-NAT10 1-201      | Subcloned | pGEX-6P-1             |
| GST-NAT10 201-488    | Subcloned | pGEX-6P-1             |
| GST-NAT10 489-753    | Subcloned | pGEX-6P-1             |
| GST-NAT10 754-1025   | Subcloned | pGEX-6P-1             |
| Flag-CHFR            | Vivogene  | pENTER                |
| GST-CHFR             | Subcloned | pGEX-6P-1             |
| shMORC2              | Origene   | pGFP-C-shLenti        |
| LentiCas9            | Addgene   | LentiCas9-Blast       |
| LentiGuide           | Addgene   | LentiGuide-Puro       |

**Table S2. Primers used for molecular cloning of expression vectors**

| Plasmids                             | Primers | Sequences                                                               |
|--------------------------------------|---------|-------------------------------------------------------------------------|
| pCDH-Flag-MORC2                      | Forward | ACCTCCATAGAAGATTCTAGAGCCACC<br>ATGCTTTGCTTTTTGGATGATGGAG                |
|                                      | Reverse | GATCCATTTAAATTCTGAATTCTTACTTA<br>TCGTTCGTCATCCTTGTAATC                  |
| pCDH-Flag-MORC2-K504A                | Forward | ACCACCATCCAGTGCGATTTGTGTCT<br>GGCTTGGAGAACCCTC                          |
|                                      | Reverse | ACTCAGCTGGAAGGGGAGGGTTCTC<br>CAAGCCAGACACAAATC                          |
| Flag-MORC2-E516A                     | Forward | CTCCCCTTCCAGCTGAGTTCTGTGGC<br>TAAAGATTACCCT                             |
|                                      | Reverse | AACCCAGGTGTCAGGGTAATCTTTAG<br>CCACAGAACTCAG                             |
| Flag-MORC2-K517A                     | Forward | CCCTTCCAGCTGAGTTCTGTGGAAGC<br>TGATTACCCTGAC                             |
|                                      | Reverse | GCAAACCCAGGTGTCAGGGTAATCAG<br>CTCCACAGAACT                              |
| Flag-MORC2-D518A                     | Forward | TTCCAGCTGAGTTCTGTGGAAAAGC<br>TTACCCTGACACC                              |
|                                      | Reverse | GGAGCAAACCCAGGTGTCAGGGTAA<br>GCTTTTTCCACAGA                             |
| Flag-MORC2-D521A                     | Forward | AGTTCTGTGGAAAAGATTACCCTGCT<br>ACCTGGGTTTGGCTCCATGAACCCT                 |
|                                      | Reverse | AGGGTTCATGGAGCAAACCCAGGTAG<br>CAGGGTAATCTTTT                            |
| Flag-MORC2-2A                        | Forward | CCCTTCCAGCTGAGTTCTGTGGCTGC<br>TGATTACCCTGAC                             |
|                                      | Reverse | GCAAACCCAGGTGTCAGGGTAATCAG<br>CAGCCACAGAACT                             |
| pCDH-Flag-MORC2-E516/K517/D518/D521A | Forward | ACCCTCCCCTTCCAGCTGAGTTCTGT<br>GGCTGCTGCTTACCCTGCTACCTGGG                |
|                                      | Reverse | TTTGC<br>AGGGTTCATGGAGCAAACCCAGGTAG<br>CAGGGTAAGCAGCAGCCACAGAACTC<br>AG |
| GST-MORC2                            | Forward | AAGTGTGACATGCTTTGCTTTTTGGA<br>TGAT                                      |
|                                      | Reverse | AAATGCGGCCGCGTCCCCCTTGGTGA<br>TGAG                                      |
| GST-MORC2 K504A                      | Forward | ACCACCATCCAGTGCGATTTGTGTCT<br>GGCTTGGAGAACCCTC                          |
|                                      | Reverse | CAGCTGGAAGGGGAGGGTTCTCCAA<br>GCCAGACACAAAT                              |
| GST-MORC2 E516A                      | Forward | CTCCCCTTCCAGCTGAGTTCTGTGGC<br>TAAAGATTACCCT                             |
|                                      | Reverse | AACCCAGGTGTCAGGGTAATCTTTAG<br>CCACAGAACTCAG                             |
| GST-MORC2 K517A                      | Forward | CCCTTCCAGCTGAGTTCTGTGGAAGC<br>TGATTACCCTGAC                             |
|                                      | Reverse | GCAAACCCAGGTGTCAGGGTAATCAG<br>CTCCACAGAACT                              |
| GST-MORC2 D518A                      | Forward | TTCCAGCTGAGTTCTGTGGAAAAGC<br>TTACCCTGACACC                              |

|                      |         |                                                         |
|----------------------|---------|---------------------------------------------------------|
|                      | Reverse | GGAGCAAACCCAGGTGTCAGGGTAA<br>GCTTTTTCCACAGA             |
| GST-MORC2 D521A      | Forward | AGTTCTGTGGAAAAAGATTACCCTGCT<br>ACCTGGGTTTGCTCCATGAACCCT |
|                      | Reverse | AGGGTTCATGGAGCAAACCCAGGTAG<br>CAGGGTAATCTTTT            |
| GST-MORC2 63-490     | Forward | CTGGGATCCCCGGAATTCATGCTTTG<br>CTTTTTGGATGATGGAG         |
|                      | Reverse | GCGGCCGCTCGAGTCGACTTAGACC<br>AGGTAGGGCACATCAACAAC       |
| GST-MORC2 491-718    | Forward | CTGGGATCCCCGGAATTCATGGTCCT<br>GGAGCCTACACACAACAACA      |
|                      | Reverse | GCGGCCGCTCGAGTCGACTTATGGA<br>GTCTTGATGACTTTGGGAGA       |
| GST-MORC2 491-718 2A | Forward | CCCTTCCAGCTGAGTTCTGTGGCTGC<br>TGATTACCCTGAC             |
|                      | Reverse | GCAAACCCAGGTGTCAGGGTAATCAG<br>CAGCCACAGAACT             |
| GST-MORC2 491-718 5A | Forward | CTGGGATCCCCGGAATTCATGGTCCT<br>GGAGCCTACACACAACAACA      |
|                      | Reverse | GCGGCCGCTCGAGTCGACTTATGGA<br>GTCTTGATGACTTTGGGAGA       |
| GST-MORC2 719-1032   | Forward | CTGGGATCCCCGGAATTCATGGTGGT<br>GAAGAAGACAGAGTCACCC       |
|                      | Reverse | GCGGCCGCTCGAGTCGACTTAGTCC<br>CCCTTGGTGATGAGGTC          |
| Myc-DDK-PARP1 K197R  | Forward | GCTACAGAGGATAAAGAAGCCCTGAA<br>GCGACAGCTCCCAGGA          |
|                      | Reverse | TCCTTCACTCTTGACTCCTGGGAGCT<br>GTCGCTTCAGGGCTTC          |
| Myc-DDK-PARP1 K203R  | Forward | GCCCTGAAGAAGCAGCTCCCAGGAG<br>TCCGAAGTGAAGGAAAG          |
|                      | Reverse | CTCATCGCCTTTTCTCTTTCCTTCACT<br>TCGGACTCCTGGGAG          |
| Myc-DDK-PARP1 K207R  | Forward | CAGCTCCCAGGAGTCAAGAGTGAAG<br>GACGAAGAAAAGGCGAT          |
|                      | Reverse | CACTCCATCCACCTCATCGCCTTTTCT<br>TCGTCCTTCACTCTT          |
| Myc-DDK-PARP1 K433R  | Forward | AACAAGGCTTCCCTGTGCATCAGCAC<br>CCGAAAGGAGGTGGAA          |
|                      | Reverse | CTTCTTATTCATCTTTTCCACCTCCTTT<br>CGGGTGCTGATGCA          |
| Myc-DDK-PARP1 K524R  | Forward | GGTATCAACAAATCTGAAAAGAGAATG<br>CGATTA ACTCTTAAA         |
|                      | Reverse | CACAGCTGCTCCTCCTTTAAGAGTTAA<br>TCGCATTCTCTTTTC          |
| Myc-DDK-PARP1 K528R  | Forward | TCTGAAAAGAGAATGAAATTA ACTCTT<br>CGAGGAGGAGCAGCT         |
|                      | Reverse | AGAATCAGGATCCACAGCTGCTCCTC<br>CTCGAAGAGTTAATTT          |
| Myc-DDK-PARP1 K662R  | Forward | AAGAAGCTGACAGTAAATCCTGGCAC<br>CCGATCCAAGCTCCCC          |
|                      | Reverse | GTCTGAACTGGCTTGGGGAGCTTG<br>GATCGGGTGCCAGGATT           |
| Myc-DDK-PARP1 K664R  | Forward | CTGACAGTAAATCCTGGCACCAAGTC                              |

---

|                     |         |                             |
|---------------------|---------|-----------------------------|
|                     |         | CCGACTCCCAAGCCA             |
|                     | Reverse | GATGAGGTCCTGAACTGGCTTGGGGA  |
|                     |         | GTCCGGACTTGGTGCC            |
| Myc-DDK-PARP1 K949R | Forward | AAGTTACCCAAGGGCAAGCACAGTGT  |
|                     |         | CCGAGGTTTGGGCAA             |
|                     | Reverse | AGGATCAGGGGTAGTTTTGCCCAAAC  |
|                     |         | CTCGGACACTGTGCTT            |
| Myc-DDK-PARP1 K949Q | Forward | GTGAATGACACCTCTCTACTATATAAC |
|                     |         | CAGTACATTGTCTAT             |
|                     | Reverse | ATAGACAATGTAAGTGTATATAGTAGA |
|                     |         | GAGGTGTCATTAC               |
| Myc-DDK-PARP1 E988K | Forward | GTGAATGACACCTCTCTACTATATAAC |
|                     |         | AAGTACATTGTCTAT             |
|                     | Reverse | TACCTGAGCAATATCATAGACAATGTA |
|                     |         | CTTGTTATATAGTAG             |
| HA-PARP1            | Forward | AAGGTCTAGAATGGCGGAGTCTTCGG  |
|                     |         | ATAA                        |
|                     | Reverse | AAGGGCGGCCGCTTAAGCGTAGTCTG  |
|                     |         | GGACGTCGTATGGGTACCACAGGGA   |
|                     |         | GGTCTTAAATT                 |
| HA-PARP1 E988K      | Forward | GTGAATGACACCTCTCTACTATATAAC |
|                     |         | AAGTACATTGTCTAT             |
|                     | Reverse | TACCTGAGCAATATCATAGACAATGTA |
|                     |         | CTTGTTATATAGTAG             |
| HA-PARP1 E988Q      | Forward | GTGAATGACACCTCTCTACTATATAAC |
|                     |         | CAGTACATTGTCTAT             |
|                     | Reverse | ATAGACAATGTAAGTGTATATAGTAGA |
|                     |         | GAGGTGTCATTAC               |
| His-PARP1           | Forward | AAGGGTCGACATGGCGGAGTCTTCG   |
|                     |         | GATAA                       |
|                     | Reverse | AAGGCTCGAGTTACCACAGGGAGGTC  |
|                     |         | TTAAATT                     |
| GST-PARP1 1-331     | Forward | CTGGGATGGGGGGAATTCATGGCGG   |
|                     |         | AGTCTTCGGATAA               |
|                     | Reverse | GCGGCCGCTCGAGTCGACTTACATAC  |
|                     |         | ACTTGGTCCAGGCAGT            |
| GST-PARP1 332-661   | Forward | CTGGGATGGGGGGAATTCGTCAAGAC  |
|                     |         | ACAGACACCCAAC               |
|                     | Reverse | GCGGCCGCTCGAGTCGACTTAGGTG   |
|                     |         | CCAGGATTTACTGTCAG           |
| GST-PARP1 662-1014  | Forward | CTGGGATGGGGGGAATTCAGTCCAA   |
|                     |         | GCTCCCAAGCCA                |
|                     | Reverse | GCGGCCGCTCGAGTCGACTTACCACA  |
|                     |         | GGGAGGTCTTAAATTG            |
| HA-NAT10            | Forward | AAGGGAATTCATGCATCGGAAAAGG   |
|                     |         | TGGAT                       |
|                     | Reverse | AAGGGGATCCTTAAGCGTAGTCTGGG  |
|                     |         | ACGTCGTATGGGTATTTCTTCCGCTTC |
|                     |         | AGTTTCATA                   |
| HA-NAT10 G641E      | Forward | GCTGTTACCCAGATTATCAAGGGAT   |
|                     |         | GGGCTATGAAAGCCGTGCTCTGCAGC  |
|                     | Reverse | TG                          |
|                     |         | TTCATAGTACATCTGCAGCAGCTGCAG |
|                     |         | AGCACGGCTTTCATAGCCCATCCCTT  |

---

---

|                    |         |                                                |
|--------------------|---------|------------------------------------------------|
| GST-NAT10 1-201    | Forward | GATA<br>AACCGGATCCATGCATCGGAAAAAGG<br>TGGAT    |
|                    | Reverse | AACCGCGGCCGCCTAATCAATGACGA<br>GACTTCTT         |
| GST-NAT10 201-488  | Forward | AACCGGATCCGACCAGCTCAACATCC                     |
|                    | Reverse | TGC<br>AACCGCGGCCGCCTAATCCAGGCACA<br>GCAAGTCAT |
| GST-NAT10 489-753  | Forward | AACCGGATCCTGCCTCAACATCACTC<br>GGAT             |
|                    | Reverse | AACCGCGGCCGCCTAATCATGCTGAA<br>GACGCTCAC        |
| GST-NAT10 754-1025 | Forward | AACCGGATCCGATGAGGATGAGGCTG<br>ACC              |
|                    | Reverse | AACCGCGGCCGCCTATTTCTTCCGCT<br>TCAGTTTCAT       |
| GST-CHFR           | Forward | AATGAATTCATGGAGCGGCCCGAGGA<br>AG               |
|                    | Reverse | AATCTCGAGTTAGTTTTTGAACCTTGT<br>CTGTTCA         |

---

**Table S3. siRNA target sequences**

|             | Primers | Sequences              |
|-------------|---------|------------------------|
| siPARP1#1   | Forward | UUCCUGCGUCUUCAUGUCCTT  |
|             | Reverse | UUCCUGCGUCUUCAUGUCCTT  |
| siPARP1#2   | Forward | GAGGAAGGUAUCAACAAUUTT  |
|             | Reverse | AUUUGUUGAUACCUUCCUCTT  |
| siPARP1#3   | Forward | GAGACCCAAUAGGCUUAAUUTT |
|             | Reverse | AUUAAGCCUAUUGGGUCUCTT  |
| siMORC2#1   | Forward | GCAGUACGGGAAUGGGUUUATT |
|             | Reverse | UAACCCAUUCCCGUACUGCTT  |
| siMORC2#2   | Forward | GCAGAGAAGCCGAUGUCAATT  |
|             | Reverse | UUGACAUCGGCUUCUCUGCTT  |
| siMORC2#3   | Forward | GGACAUGAAGACGCAGGAATT  |
|             | Reverse | UUCCUGCGUCUUCAUGUCCTT  |
| siPARG#1    | Forward | GGAAUCAAGACAGCGGAAUUTT |
|             | Reverse | AUUCCGCUGUCUUGAUUCCTT  |
| siPARG#2    | Forward | GCGGUGAAGUUAGAUUACATT  |
|             | Reverse | CCACGACGAAAUGCUAAGATT  |
| siPARG#3    | Forward | CCACGACGAAAUGCUAAGATT  |
|             | Reverse | UCUUAGCAUUUCGUCGUGGTT  |
| siMacroD1#1 | Forward | CCACCGGCGUGUUUGGCUATT  |
|             | Reverse | UAGCCAAACACGCCGGUGGTT  |
| siMacroD1#2 | Forward | GCUGCUACCUGAGCAGUCUTT  |
|             | Reverse | AGACUGCUCAGGUAGCAGCTT  |
| siMacroD1#3 | Forward | GGCUGAUCAUCUGCGUGUUTT  |
|             | Reverse | AACACGCAGAUGAUCAGCCTT  |

**Table S4. Primers used for the PCR reaction**

|       | Primers | Sequences              |
|-------|---------|------------------------|
| MORC2 | Forward | CGTTGAGCTAGCACCCCTAAAG |
|       | Reverse | GGGCTCCTCTGAGCTGCATT   |
| PARP1 | Forward | CCCCTGCTTGGATTTAACAAG  |
|       | Reverse | ATTATAGTCAATAGAGGGAC   |

**Table S5. Primary antibodies used in this study**

| Antibodies        | Vendors    | Cat#        | Species    | WB | IHC | IP | IF |
|-------------------|------------|-------------|------------|----|-----|----|----|
| MORC2             | Bethyl     | A300-149    | Rabbit pAb | √  |     | √  |    |
| Flag              | Sigma      | F3165       | Mouse mAb  | √  |     | √  |    |
| Vinculin          | Sigma      | V9131       | Mouse mAb  | √  |     |    |    |
| HA                | CST        | C29F4       | Rabbit pAb | √  |     | √  |    |
| PARP1             | Santa Cruz | SC8007      | Mouse mAb  | √  | √   | √  | √  |
| NAT10             | Abcam      | ab194297    | Rabbit mAb | √  | √   | √  | √  |
| GFP               | Santa Cruz | sc-9996     | Mouse mAb  | √  |     | √  | √  |
| MYC               | GNI        | GNI4110-MC  | Mouse mAb  | √  |     | √  |    |
| CHFR              | CST        | 4297        | Rabbit mAb | √  |     | √  |    |
| PAR               | Trevigen   | 4335-MC-100 | Mouse mAb  | √  |     | √  | √  |
| PARG              | CST        | 66564       | Rabbit mAb | √  |     | √  |    |
| γH2AX             | CST        | 7631s       | Rabbit mAb | √  |     |    |    |
| γH2AX             | Abcam      | ab26350     | Mouse mAb  | √  | √   | √  | √  |
| V5                | CST        | 13202S      | Rabbit pAb | √  |     | √  | √  |
| GST               | CST        | 2624        | Mouse mAb  | √  |     |    |    |
| Acetylated-Lysine | CST        | 9441s       | Rabbit mAb | √  | √   | √  | √  |
| Ubiquitin         | CST        | 3936s       | Rabbit mAb | √  |     | √  |    |
| XRCC1             | Abcam      | 134056      | Rabbit pAb | √  | √   | √  | √  |
| Rad51             | Abcam      | ab133534    | Rabbit pAb | √  | √   | √  | √  |
| 53BP1             | Abcam      | ab175933    | Rabbit pAb | √  | √   | √  | √  |
| BRCA1             | Santa Cruz | sc-6954     | Mouse mAb  | √  |     | √  | √  |
| MacroD1           | Origene    | A331983     | Rabbit pAb | √  |     |    |    |

*mAb, monoclonal antibody; pAb, polyclonal antibody.*



**Table S6. Primers for qPCR analysis**

| Genes | qPCR Primers | Sequences            |
|-------|--------------|----------------------|
| MORC2 | Forward      | AAGCCGTTTCAAGACC     |
|       | Reverse      | GTCGCAACATCACCT      |
| PARP1 | Forward      | CTGGGGAGTCGGCGATCTT  |
|       | Reverse      | GGTACCCACTCCTTCCGGT  |
| GAPDH | Forward      | CGAGATCCCTCCAAAATCAA |
|       | Reverse      | TTCACACCCATGACGAACAT |

## References

1. Washburn, M.P., Wolters, D. and Yates, J.R., 3rd. (2001) Large-scale analysis of the yeast proteome by multidimensional protein identification technology. *Nat Biotech*, **19**, 242-247.
